# Supplementary material for: Mesoporous Silica with Site-Isolated Amine and Phosphotungstic Acid Groups: A Solid Catalyst with Tunable Antagonistic Functions for One-Pot Tandem Reactions
Source: PubMed Central journal article supplement (PMC3303888; doi:10.1002/anie.201101449), 2011-09-15
Supplement: anie0050-9615-SD1.pdf [file anie0050-9615-SD1.pdf]

Supporting Information

© Wiley-VCH 2011

69451 Weinheim, Germany

**Mesoporous Silica with Site-Isolated Amine and Phosphotungstic Acid Groups: A Solid Catalyst with Tunable Antagonistic Functions for One-Pot Tandem Reactions\*\***

*N. Raveendran Shiju,\* Albert H. Alberts, Syed Khalid, David R. Brown, and Gadi Rothenberg\**

anie\_201101449\_sm\_miscellaneous\_information.pdf

## Supporting Information

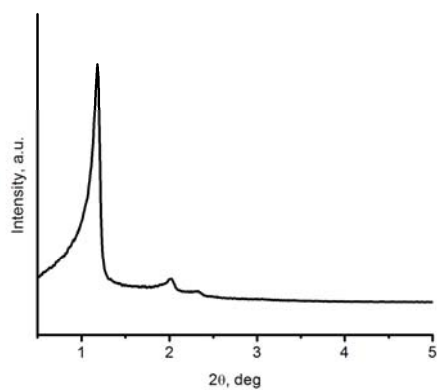

**Figure S1.** Powder X-ray diffraction pattern of calcined SBA-15.

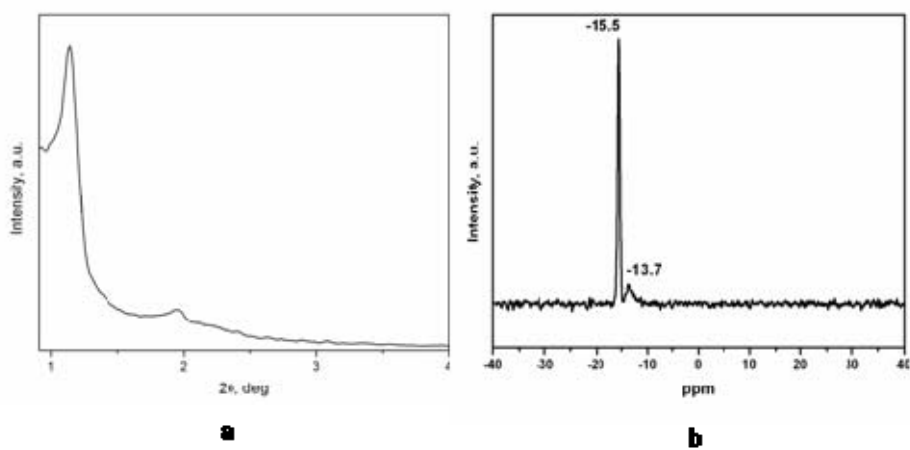

**Figure S2.** Powder X-ray diffraction pattern (a) and <sup>31</sup>P NMR spectrum (b) of SAB.

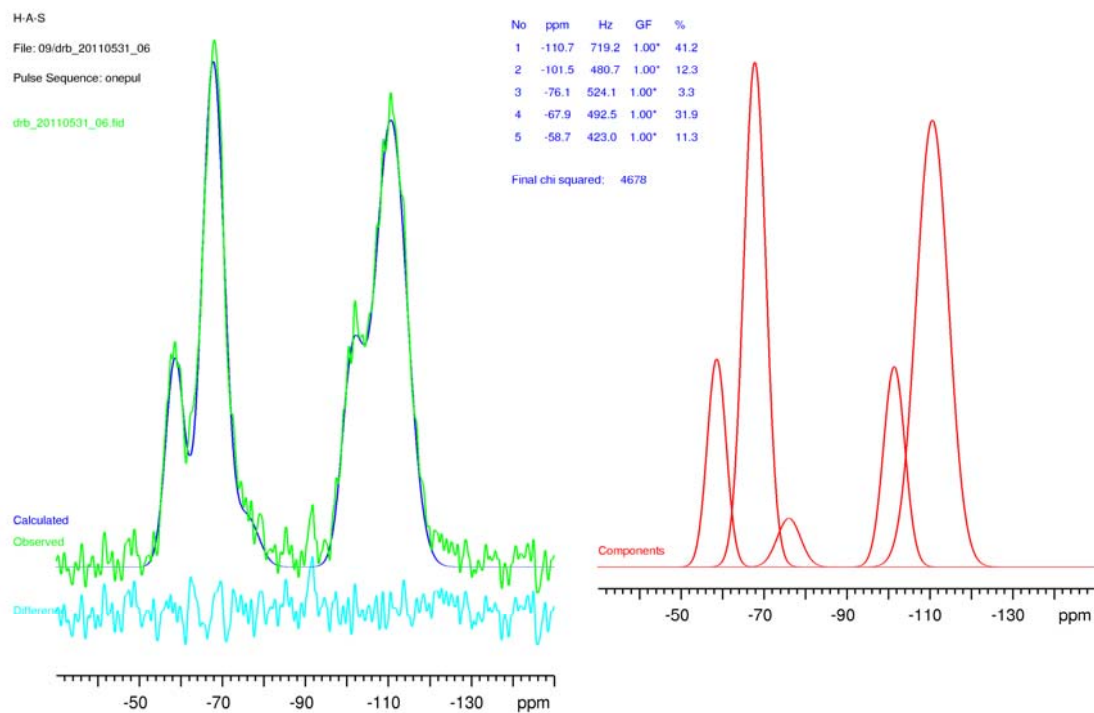

**Figure S3.** Direct excitation silicon MAS NMR spectrum of **SAB**. The spectrum was recorded with a 60 s recycle and the deconvolution shows relative intensities of different peaks.
